# Supplementary material for: Luminescence and energy transfer of single-phase white-emitting phosphor Ba2Mg(PO4)2:Ce3+, Eu2+ for white LEDs
Source: Royal Society of Chemistry journal article supplement (doi:10.1039/d2ra06357c), 2022-01-01
Supplement: d2ra06357c1.pdf [file d2ra06357c1.pdf]

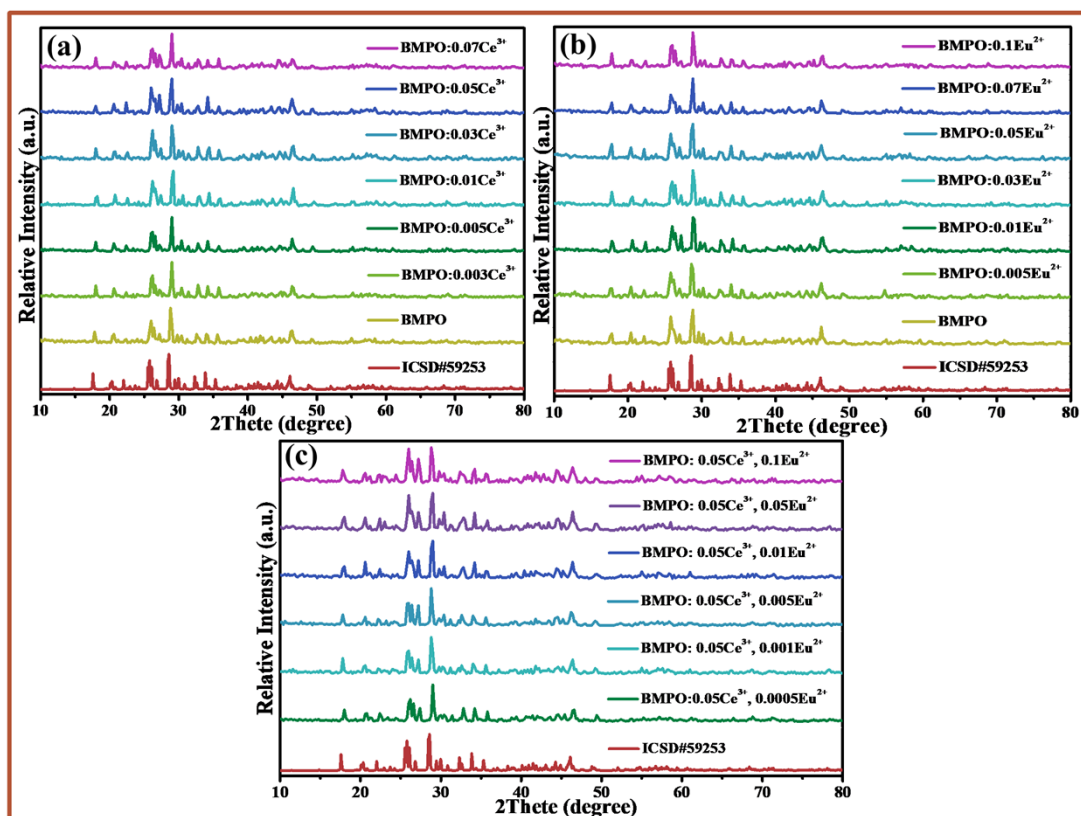

Fig. S1(a) XRD patterns of BMPO: $x\text{Ce}^{3+}$  and BMPO(ICSD#59253). (b) XRD patterns of BMPO: $y\text{Eu}^{2+}$  and BMPO(ICSD#59253). (c) XRD patterns of BMPO: $0.05\text{Ce}^{3+}, x\text{Eu}^{2+}$  and BMPO(ICSD#59253).

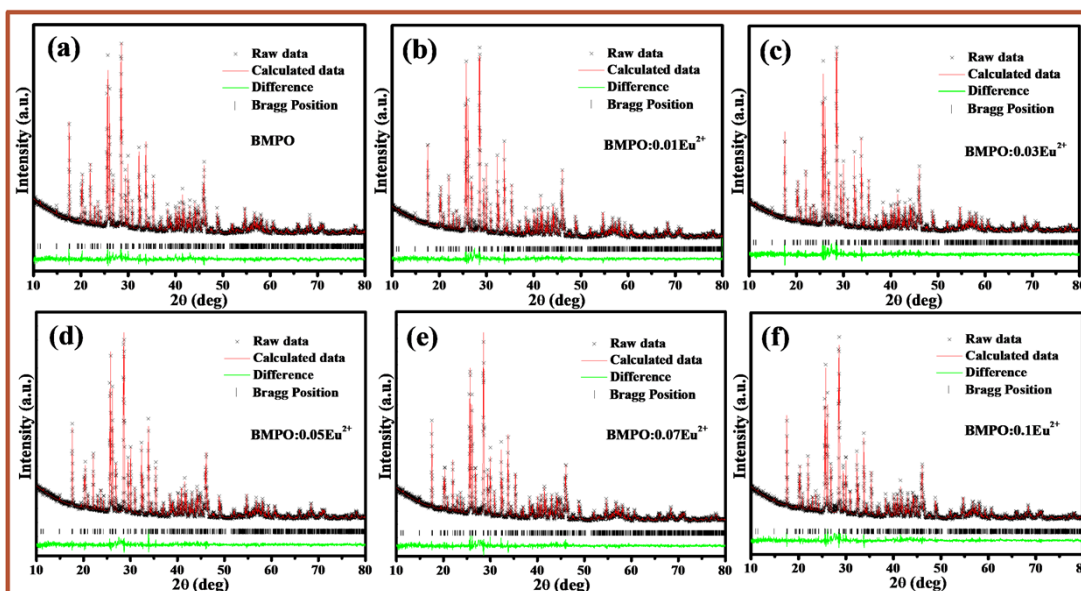

Fig. S2(a-f) Rietveld refinement results of BMPO: $y\text{Eu}^{2+}$  ( $y=0, 0.01, 0.03, 0.05, 0.07, 0.1$ ).

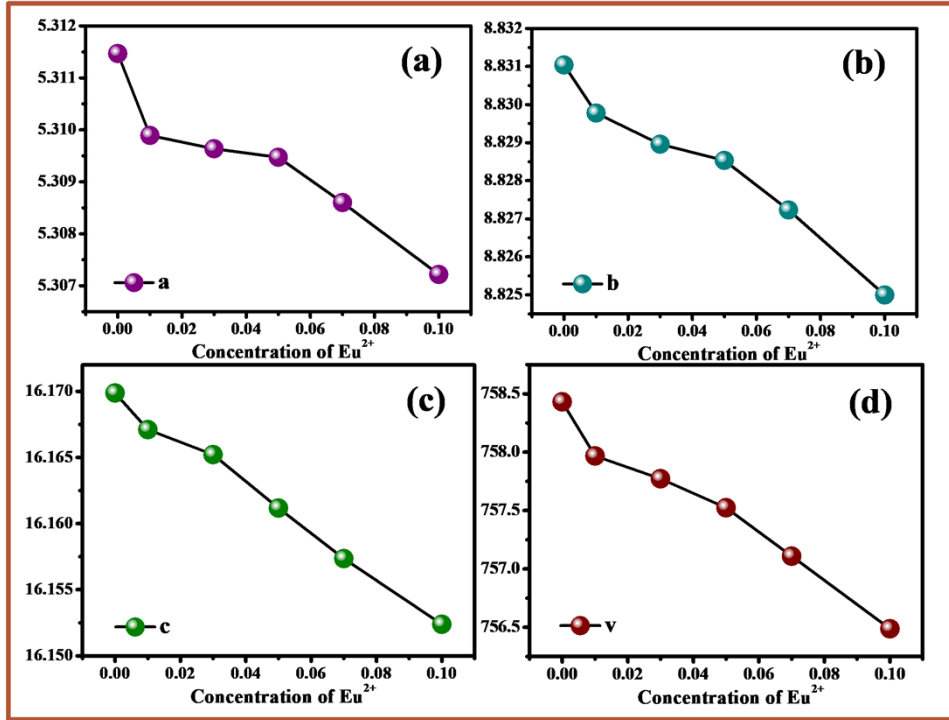

Fig. S3(a-d) Evolution of lattice parameters a, b, c and the unit cell volume V of  $\text{Ba}_2\text{Mg}(\text{PO}_4)_2:y\text{Eu}^{2+}$  ( $y=0, 0.01, 0.03, 0.05, 0.07, 0.1$ ).

Table S1 The refined parameters of  $\text{Ba}_2\text{Mg}(\text{PO}_4)_2$  and standard card of  $\text{Ba}_2\text{Mg}(\text{PO}_4)_2$  (ICSD #59253)

|                    | $\text{Ba}_2\text{Mg}(\text{PO}_4)_2$ (ICSD #59253) | $\text{Ba}_2\text{Mg}(\text{PO}_4)_2$ |
|--------------------|-----------------------------------------------------|---------------------------------------|
| Space group        | P121/n1                                             | P121/n1                               |
| Symmetry           | Monoclinic                                          | Monoclinic                            |
| a(Å)               | 5.294                                               | 5.311                                 |
| b(Å)               | 8.837                                               | 8.831                                 |
| c(Å)               | 16.1430                                             | 16.16                                 |
| V(Å <sup>3</sup> ) | 755.18                                              | 758.43                                |
| $\alpha$ (deg)     | 90                                                  | 90                                    |
| $\beta$ (deg)      | 90                                                  | 90                                    |
| $\gamma$ (deg)     | 90                                                  | 90                                    |
| Z                  | 4                                                   | 4                                     |
| R <sub>p</sub>     | -                                                   | 6.71%                                 |
| R <sub>wp</sub>    | -                                                   | 8.90%                                 |
| $\chi^2$           | -                                                   | 1.916                                 |

Table S2 The refined parameters of Ba<sub>2</sub>Mg(PO<sub>4</sub>)<sub>2</sub>: yEu<sup>2+</sup>(y=0, 0.01, 0.03, 0.05, 0.07, 0.1)

|                    | y = 0     | y = 0.01  | y = 0.03  | y = 0.05  | y = 0.07  | y = 0.1   |
|--------------------|-----------|-----------|-----------|-----------|-----------|-----------|
| Space group        | P121/n1   | P121/n1   | P121/n1   | P121/n1   | P121/n1   | P121/n1   |
| $\chi^2$           | 1.916     | 1.943     | 1.935     | 1.540     | 1.657     | 1.864     |
| R <sub>p</sub>     | 6.71%     | 6.29%     | 6.45%     | 5.86%     | 6.07%     | 6.3%      |
| R <sub>wp</sub>    | 8.90%     | 8.78%     | 8.85%     | 7.96%     | 8.16%     | 8.53%     |
| $\alpha$ (deg)     | 90        | 90        | 90        | 90        | 90        | 90        |
| $\beta$ (deg)      | 90        | 90        | 90        | 90        | 90        | 90        |
| a(Å)               | 5.311469  | 5.309893  | 5.309635  | 5.309472  | 5.308600  | 5.307217  |
| b(Å)               | 8.831038  | 8.829777  | 8.828957  | 8.828533  | 8.827232  | 8.824997  |
| c(Å)               | 16.169868 | 16.167109 | 16.165216 | 16.161179 | 16.157356 | 16.152388 |
| V(Å <sup>3</sup> ) | 758.431   | 757.968   | 757.772   | 757.524   | 757.109   | 756.487   |
